# Supplementary material for: Prevention of doxorubicin sorptive losses in drug delivery studies using polyethylene glycol
Source: Royal Society of Chemistry journal article supplement (doi:10.1039/c5ra01799h), 2015-01-01
Supplement: c5ra01799h1.pdf [file c5ra01799h1.pdf]

ARTICLE

† Electronic Supplementary Information (ESI) available: [Supporting data on adsorption of DOX on surfaces of AuNP and PEG; and optical absorbance of HEPES]

## Prevention of doxorubicin sorptive losses in drug delivery studies using polyethylene glycol

Dennis Curry,<sup>a,b,c</sup> Hope Scheller,<sup>a,b</sup> Mingsheng Lu,<sup>a</sup> Martin Mkandawire,<sup>a,d</sup> Mark R. Servos,<sup>c</sup> Shufen Cui,<sup>e</sup> Xu Zhang<sup>\*a,c,d</sup> and Ken D. Oakes,<sup>a,b</sup>

\*Corresponding author. Email: [xu\\_zhang@cbu.ca](mailto:xu_zhang@cbu.ca); Tel: +1 902 563 1608.

### Supporting Data:

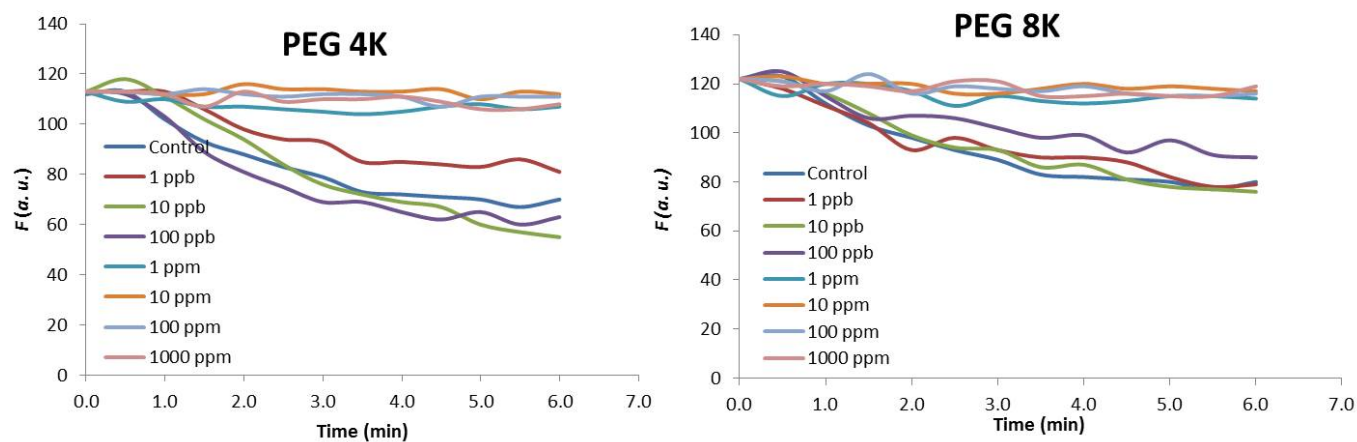

Fig. S1. The effect of PEG 4K and PEG 8K (various concentrations) on DOX adsorption to plate-well surfaces. In control wells, no chemicals other than DOX aqueous solution were added.

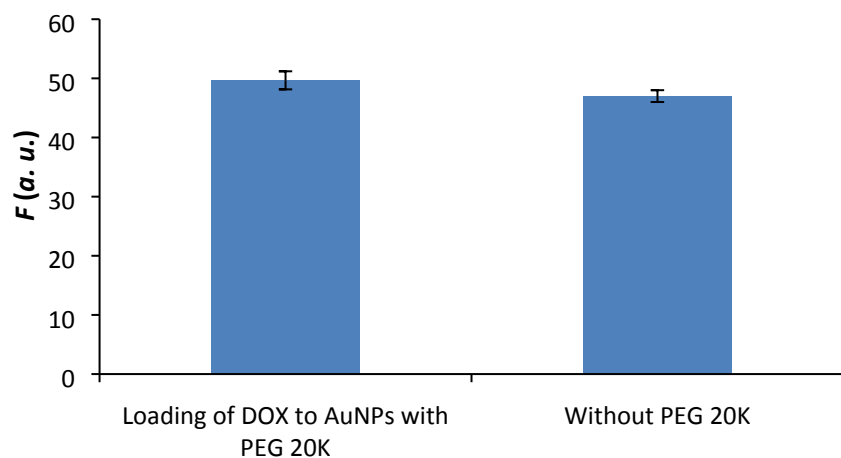

Fig. S2. Comparison of DOX adsorbance onto AuNP surfaces in the presence and absence of 10 ppm PEG 20K. AuNP-DOX conjugates were dissolved with 2  $\mu$ L of 1 M KCN solution into 100  $\mu$ L of AuNP-DOX solution with released DOX quantified by fluorescence. The data demonstrate no significant impact of PEG 20K on DOX loading to gold nanoparticles ( $p = 0.065$ ; one-way ANOVA).

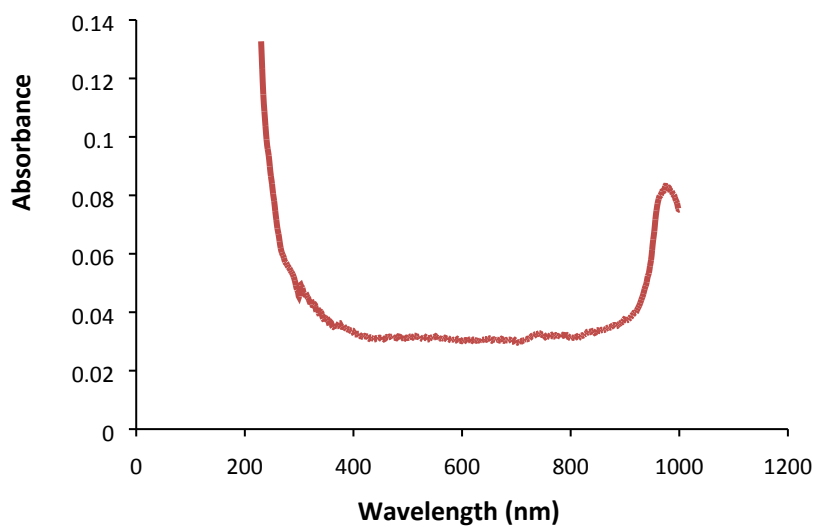

Fig. S3. Optical absorbance of 1% PEG 20K in 5 mM HEPES buffer.
